# Supplementary material
Source: MDPI journal article supplement (https://www.mdpi.com/2072-4292/10/9/1331)
Supplement: s1 [file s1]

Archive with 2 entries (2 files):
- Supp_Data_Ground truth.pdf
- Supplementary Mat_Tables.docx
