# Supplementary material
Source: MDPI journal article supplement (https://www.mdpi.com/2072-4292/10/9/1331)
Supplement: s1 [file s1 › Supp_Data_Ground truth.pdf]

Underwater footages and still images have been used to confirm the visual interpretation of the most difficult areas (e.g. the deepest patches of *Posidonia*, accumulation areas of dead leaves, isolated *Sabellaria* formation on sand). An accurate identification of ground truth points was carried out with handheld GPS units with EGNOS correction (Garmin GPSmap 62 or Garmin Etrex30).

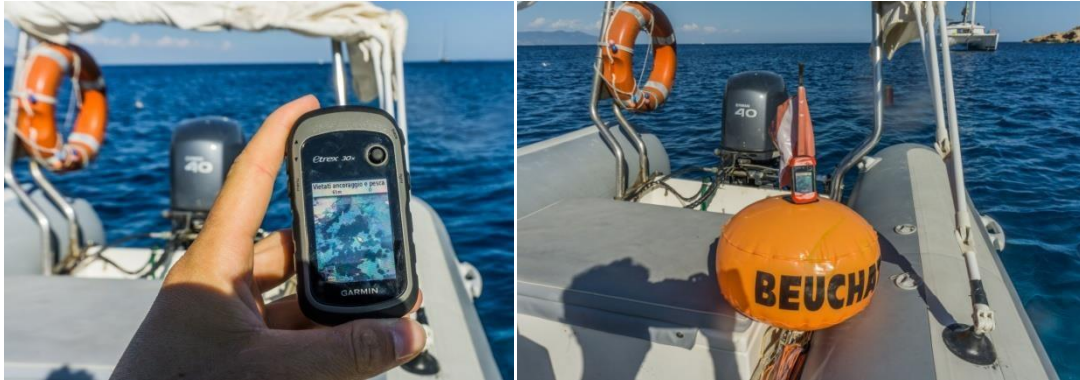

**The orthomosaic of the S1 site uploaded into handheld GPS and attached on the marker buoy for a precise identification of underwater features to be validated through ground truth.**

Below are reported the positions of ground truth points used during the visual estimation (colors represent the cover classes) and with a black cross are reported the most difficult points which we have validated by underwater photography.

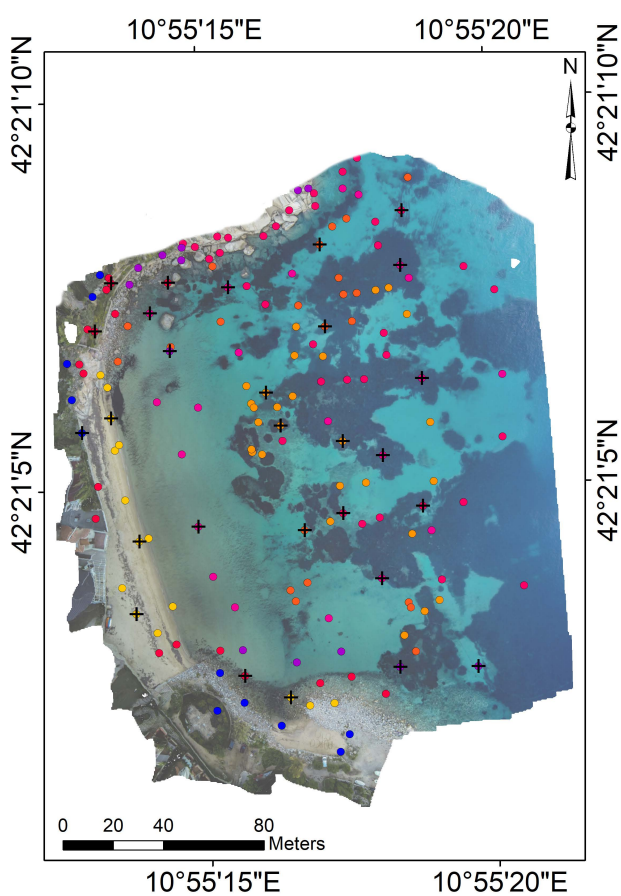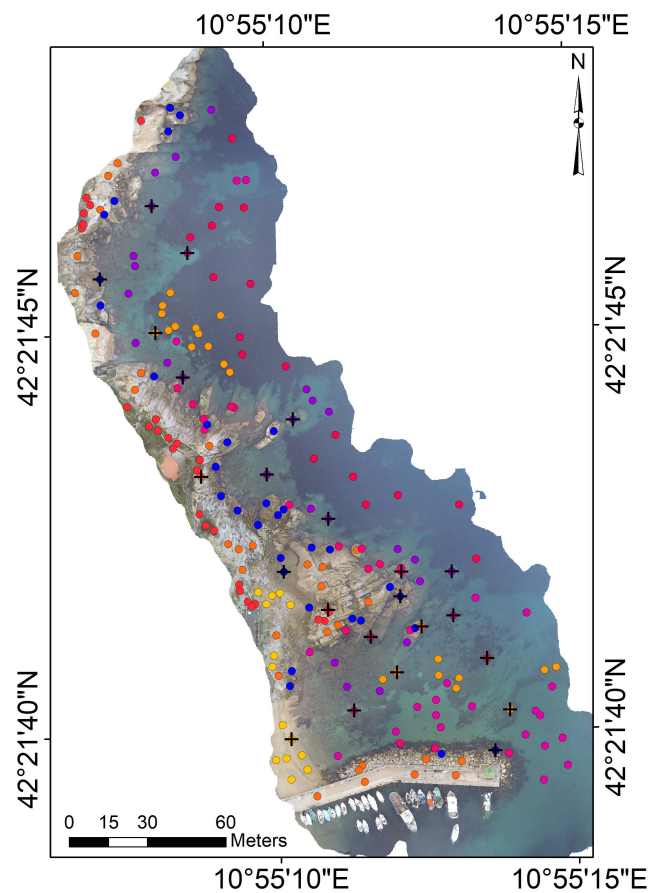

**S1-S2**

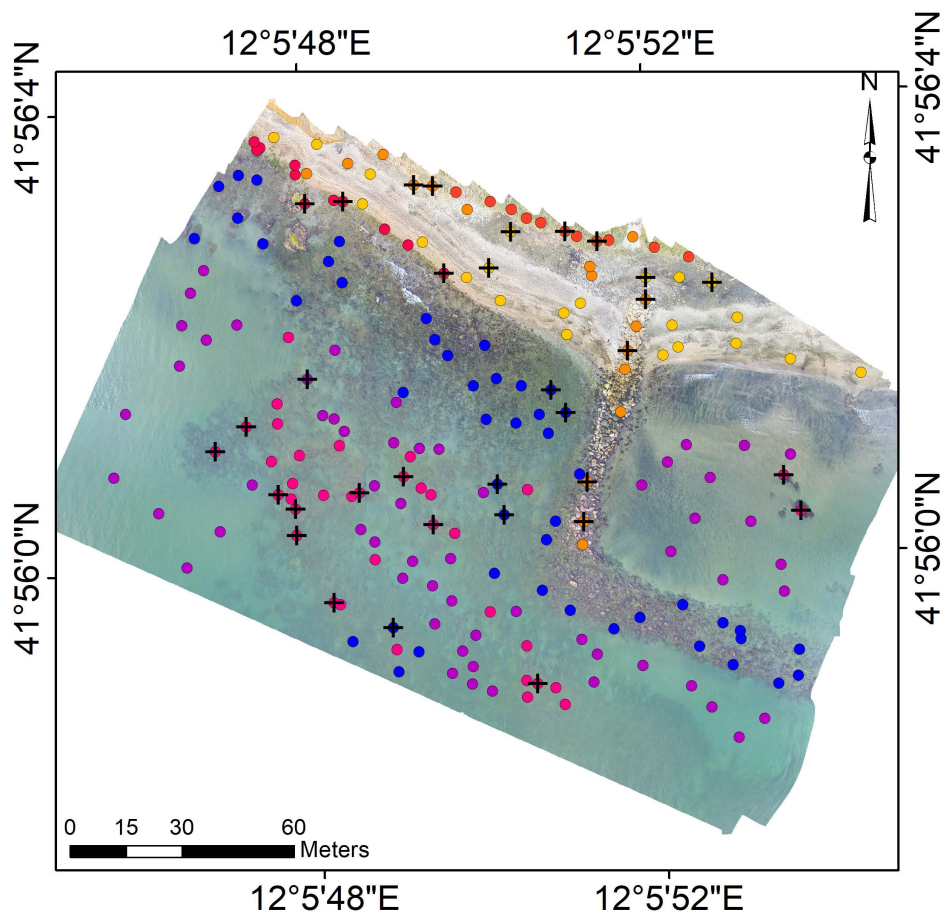

S3

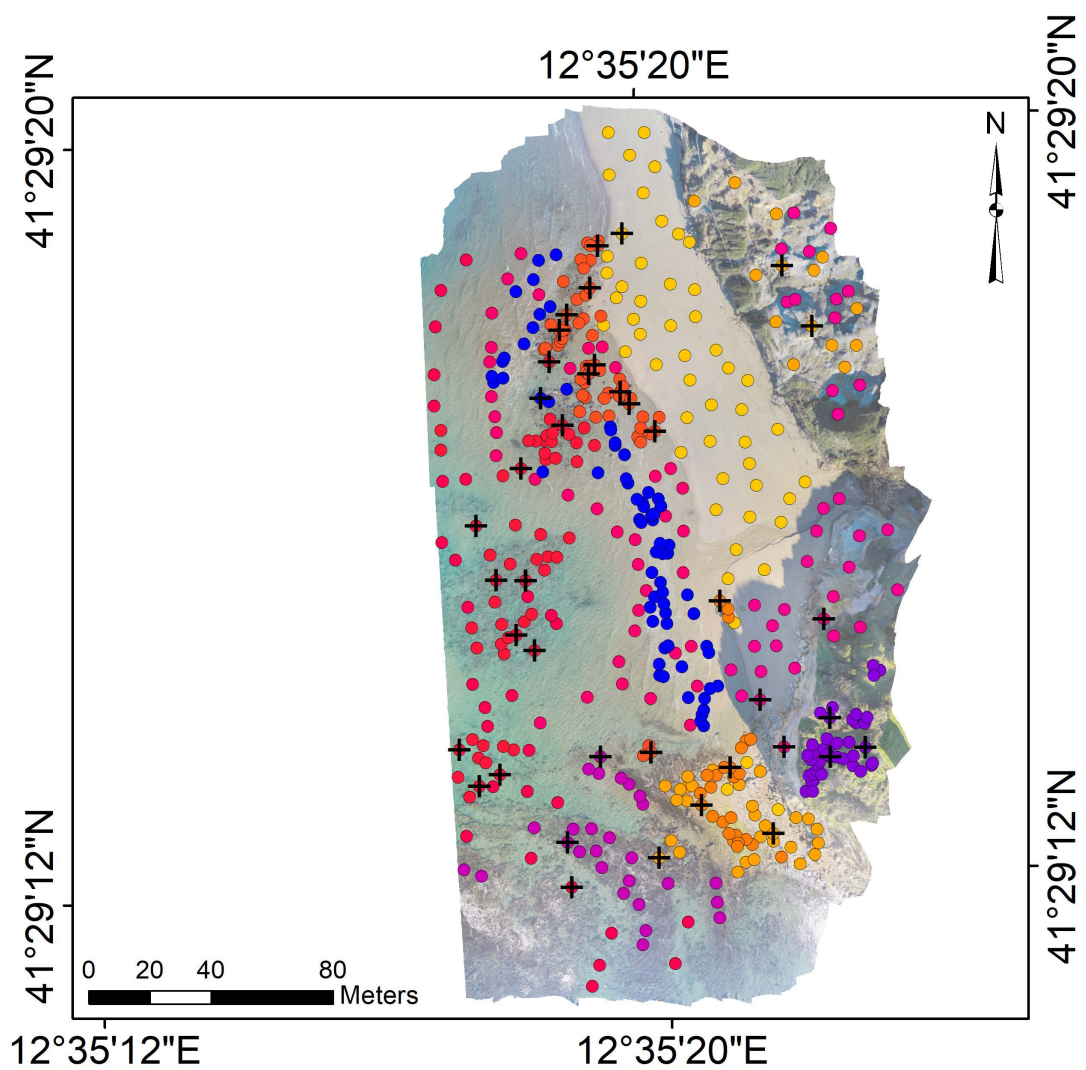

S4
