# Supplementary material
Source: MDPI journal article supplement (https://www.mdpi.com/2072-4292/10/9/1331)
Supplement: s1 [file s1 › Supplementary Mat_Tables.docx]

|  |  |  | **Reference data** | | | | | | | |
| --- | --- | --- | --- | --- | --- | --- | --- | --- | --- | --- |
| **Classified data** |  | Area (Sq m) | Beach | Dead 'matte' | Dead leaves of *P. oceanica* | Emerged rock | *P. oceanica* | Sand | Submerged rock | Vegetation |
| Beach | 2687 | 15 | 0 | 0 | 1 | 0 | 0 | 0 | 0 |
| Dead 'matte' | 1630 | 0 | 24 | 0 | 0 | 0 | 0 | 0 | 0 |
| Dead leaves of *P. oceanica* | 1692 | 0 | 0 | 13 | 0 | 14 | 0 | 0 | 0 |
| Emerged rock | 3438 | 0 | 0 | 0 | 23 | 0 | 0 | 0 | 0 |
| *P. oceanica* | 10851 | 0 | 0 | 8 | 0 | 22 | 0 | 0 | 0 |
| Sand | 17452 | 0 | 3 | 0 | 0 | 0 | 21 | 0 | 0 |
| Submerged rock | 3217 | 0 | 0 | 0 | 0 | 0 | 0 | 22 | 0 |
| Vegetation | 2441 | 0 | 0 | 0 | 0 | 0 | 0 | 0 | 12 |
| **Producer's accuracy** | |  | 1.00 | 0.89 | 0.62 | 0.96 | 0.61 | 1.00 | 1.00 | 1.00 |
| **User's accuracy** | |  | 0.94 | 1.00 | 0.48 | 1.00 | 0.73 | 0.88 | 1.00 | 1.00 |
| **Overall Accuracy** | |  | 0.85 |  |  |  |  |  |  |  |
| **KIA** | |  | 0.83 |  |  |  |  |  |  |  |

**Table S1:** Confusion matrix assessing the classification accuracy after OBIA algorithm for the S1 site.

|  | **Reference data** | | | | | | | | | | |
| --- | --- | --- | --- | --- | --- | --- | --- | --- | --- | --- | --- |
| **Classified data** |  | Area (Sq m) | *Beach* | *Dead 'matte'* | *Dry rock* | *Vegetation* | *P. oceanica* | *Rock with algae* | *Sand* | *Submerged rock* | *Wet rock* |
| *Beach* | 618 | 13 | 0 | 0 | 0 | 0 | 0 | 0 | 0 | 0 |
| *Dead 'matte'* | 1894 | 0 | 17 | 0 | 0 | 0 | 0 | 0 | 1 | 0 |
| *Dry rock* | 3773 | 0 | 0 | 32 | 0 | 0 | 0 | 0 | 0 | 1 |
| *Vegetation* | 416 | 0 | 0 | 0 | 20 | 0 | 0 | 0 | 0 | 0 |
| *P. oceanica* | 6687 | 0 | 2 | 0 | 0 | 18 | 0 | 0 | 0 | 0 |
| *Rock with algae* | 542 | 0 | 0 | 0 | 0 | 0 | 14 | 0 | 0 | 0 |
| *Sand* | 5847 | 0 | 0 | 0 | 0 | 0 | 0 | 24 | 11 | 0 |
| *Submerged rock* | 6088 | 0 | 3 | 0 | 1 | 0 | 3 | 1 | 22 | 1 |
| *Wet rock* | 3491 | 1 | 0 | 1 | 6 | 0 | 2 | 0 | 2 | 30 |
| **Producer's accuracy** | |  | 0.93 | 0.77 | 0.97 | 0.74 | 1.00 | 0.74 | 0.96 | 0.61 | 0.94 |
| **User's accuracy** | |  | 1.00 | 0.94 | 0.97 | 1.00 | 0.90 | 1.00 | 0.69 | 0.71 | 0.71 |
| **Overall Accuracy** | |  | 0.84 |  |  |  |  |  |  |  |  |
| **KIA** | |  | 0.82 |  |  |  |  |  |  |  |  |

**Table S2:** Confusion matrix assessing the classification accuracy after OBIA algorithm for the S2 site.

|  | **Reference data** | | | | | | | | |
| --- | --- | --- | --- | --- | --- | --- | --- | --- | --- |
| **Classified data** |  | Area (Sq m) | *Beach* | *Emerged rock* | *Vegetation* | *Green algae* | *Sabellariasub. Reef* | *Sand* | *Submerged rock* |
| *Beach* | 361 | 20 | 4 | 4 | 2 | 0 | 0 | 0 |
| *Emerged rock* | 772 | 0 | 12 | 0 | 0 | 0 | 0 | 0 |
| *Vegetation* | 160 | 0 | 0 | 7 | 0 | 0 | 0 | 0 |
| *Green algae* | 32 | 0 | 0 | 0 | 6 | 0 | 0 | 0 |
| *Sabellaria sub. Reef* | 124 | 2 | 0 | 0 | 0 | 24 | 1 | 1 |
| *Sand* | 118 | 0 | 0 | 0 | 0 | 5 | 56 | 4 |
| *Submerged rock* | 937 | 0 | 1 | 0 | 3 | 7 | 2 | 42 |
| **Producer's accuracy** | |  | 0.91 | 0.71 | 0.64 | 0.55 | 0.67 | 0.95 | 0.89 |
| **User's accuracy** | |  | 0.67 | 1.00 | 1.00 | 1.00 | 0.86 | 0.86 | 0.76 |
| **Overall Accuracy** | |  | 0.81 |  |  |  |  |  |  |
| **KIA** | |  | 0.77 |  |  |  |  |  |  |

**Table S3:** Confusion matrix assessing the classification accuracy after OBIA algorithm for the S3 site.

| **Reference data** | | | | | | | | | | | | | |
| --- | --- | --- | --- | --- | --- | --- | --- | --- | --- | --- | --- | --- | --- |
| **Classified data** |  | Area (Sq m) | *Beach* | *Emerged rocks* | *Green algae* | *Sabellaria (emerged reef)* | *Sabellaria (sub.reef)* | *Sand (deep)* | *Sand (shallow)* | *Shadows* | *Submerged rocks* | *Vegetation* | *Whitecaps* |
| Beach | 567 | 51 | 1 | 4 | 1 | 0 | 0 | 0 | 0 | 0 | 0 | 0 |
| Emerged rocks | 362 | 0 | 42 | 2 | 0 | 0 | 0 | 0 | 0 | 0 | 0 | 0 |
| Green algae | 167 | 0 | 0 | 19 | 0 | 0 | 0 | 0 | 0 | 0 | 0 | 0 |
| Sabellaria (emerged reef) | 517 | 0 | 0 | 0 | 35 | 3 | 0 | 0 | 0 | 0 | 0 | 2 |
| Sabellaria (sub.reef) | 129 | 0 | 0 | 0 | 0 | 36 | 0 | 0 | 0 | 1 | 0 | 0 |
| Sand (deep) | 671 | 0 | 0 | 0 | 0 | 5 | 24 | 1 | 0 | 1 | 0 | 0 |
| Sand (shallow) | 922 | 1 | 0 | 1 | 20 | 11 | 5 | 37 | 2 | 0 | 0 | 12 |
| Shadows | 523 | 0 | 0 | 0 | 0 | 0 | 0 | 0 | 33 | 0 | 3 | 0 |
| Submerged rocks | 405 | 0 | 0 | 0 | 4 | 0 | 0 | 0 | 0 | 25 | 0 | 0 |
| Vegetation | 274 | 0 | 0 | 0 | 0 | 0 | 0 | 0 | 0 | 0 | 37 | 0 |
| White caps | 279 | 0 | 0 | 0 | 0 | 0 | 0 | 0 | 0 | 0 | 0 | 54 |
| **Producer's accuracy** | |  | 0.98 | 0.98 | 0.73 | 0.58 | 0.65 | 0.83 | 0.97 | 0.94 | 0.93 | 0.93 | 0.79 |
| **User's accuracy** | |  | 0.89 | 0.95 | 1.00 | 0.88 | 0.97 | 0.77 | 0.42 | 0.85 | 0.86 | 1.00 | 1.00 |
| **Overall Accuracy** | |  | 0.82 |  |  |  |  |  |  |  |  |  |  |
| **KIA** | |  | 0.80 |  |  |  |  |  |  |  |  |  |  |
